# Supplementary material for: Fat mass and obesity-associated protein regulates RNA methylation associated with depression-like behavior in mice
Source: PubMed Central journal article supplement (PMC8626436; doi:10.1038/s41467-021-27044-7), 2021-11-26
Supplement: 41467_2021_27044_MOESM1_ESM.pdf [file 41467_2021_27044_MOESM1_ESM.pdf]

## **Supplementary Information**

Liu et al.

**Fat mass and obesity-associated protein regulates RNA methylation associated with depression-like behavior in mice.**

## Supplementary Figure 1.

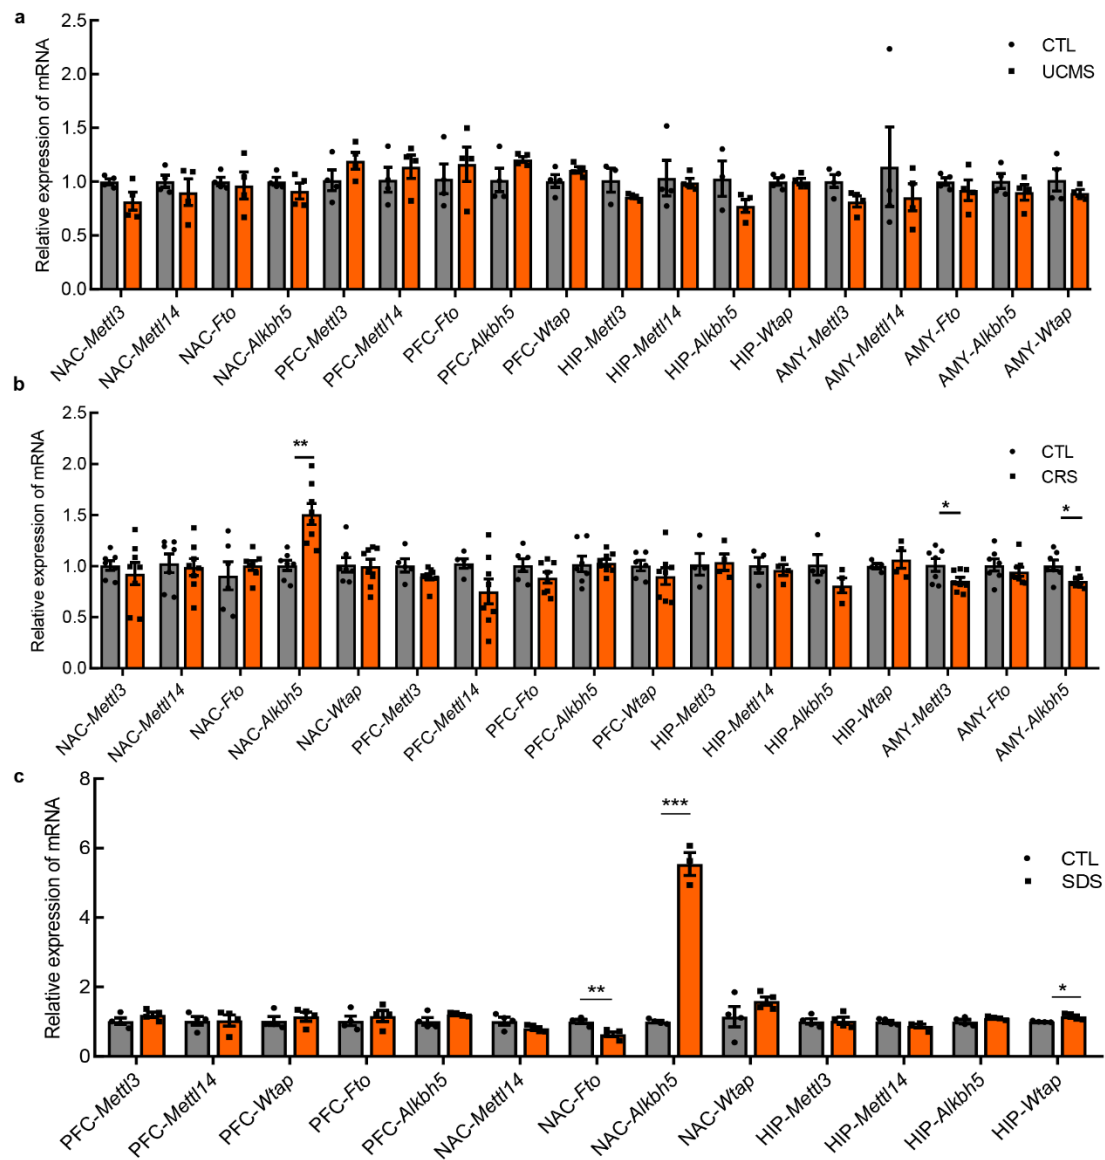

## Supplementary Figure 1. mRNA expression of genes encoding m<sup>6</sup>A-modifying enzymes in emotion-regulating brain regions of mouse models of depression

**(a)** mRNA expression in the UCMS model. NAC, nucleus accumbens; PFC, prefrontal cortex; HIP, hippocampus; AMY, amygdala, n = 4 per group except for HIP-*Mettl3* CTL, HIP-*Alkbh5*, n = 3. **(b)** mRNA expression in the CRS model, NAC-*Mettl3*, NAC-*Mettl14*, NAC-*Alkbh5*, NAC-*Wtap*, PFC-*Alkbh5*, AMY-*Mettl3*, AMY-*Fto*, AMY-*Alkbh5* CTL and NAC-*Fto*, AMY-*Alkbh5* CRS, n = 7; PFC-*Mettl3* and PFC-*Mettl14*, n

= 5; NAC-*Fto*, PFC-*Fto* and PFC-*Wtap* CTL, n = 6; HIP-*Mettl3*, HIP-*Mettl14*, HIP-*Alkbh5*, HIP-*Wtap* CTL and CRS, n = 4; NAC-*Mettl3*, NAC-*Mettl14*, NAC-*Alkbh5*, NAC-*Wtap*, PFC-*Mettl3*, PFC-*Mettl14*, PFC-*Fto*, PFC-*Alkbh5*, PFC-*Wtap*, Amy-*Mettl3* and AMY-*Fto* CRS, n = 8.. NAC-*Alkbh5*, p = 0.001004; AMY-*Mettl3*, p = 0.042111; AMY-*Alkbh5*, p = 0.019478. (c) mRNA expression in the SDS model. n = 4 per group except for NAC-*Alkbh5* n = 3. NAC-*Fto*, p = 0.006863; NAC-*Alkbh5*, p = 0.000016; HIP-*Wtap*, p = 0.016705. \*p < 0.05, \*\*p < 0.01, \*\*\*p < 0.001. Two-tailed Student's t-test. Error bars represent s.e.m. Source data are provided as a Source Data file.

## Supplementary Figure 2.

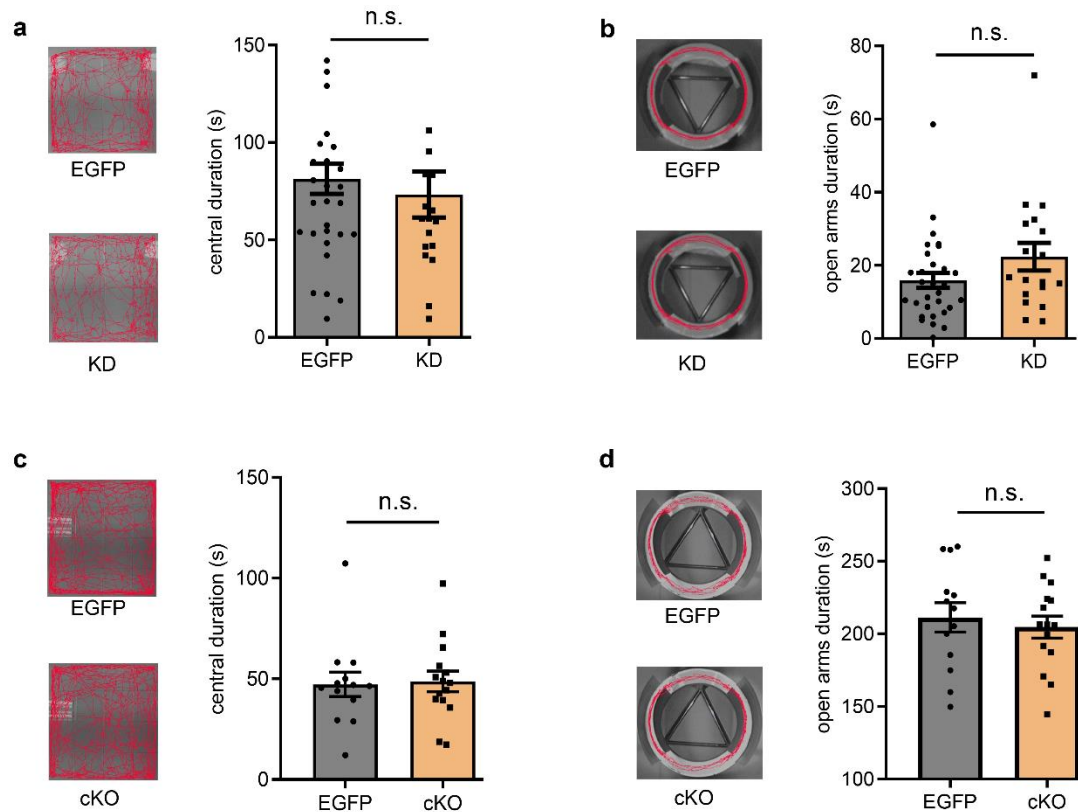

### Supplementary Figure 2. Suppression of the expression of FTO in the hippocampus does not affect anxiety-like behaviors

**(a)** Representative images of movement tracks and the central duration in the open field test (OFT) for KD mice. Ctl,  $n = 31$ ; KD,  $n = 18$ . **(b)** Representative images of movement tracks and the duration in the open arms in the elevated zero maze test (EZM) for KD mice. Ctl,  $n = 31$ ; KD,  $n = 18$ . **(c)** Representative images of movement tracks and the central duration in the open field test (OFT) for cKO mice. Ctl,  $n = 13$ ; cKO,  $n = 15$ . **(d)** Representative images of movement tracks and the duration in the open arms in the elevated zero maze test (EZM) in cKO mice. Ctl,  $n = 13$ ; cKO,  $n = 15$ . n.s., no significant. Two-tailed Student's t-test. Error bars represent s.e.m. Source data are provided as a Source Data file.

### Supplementary Figure 3.

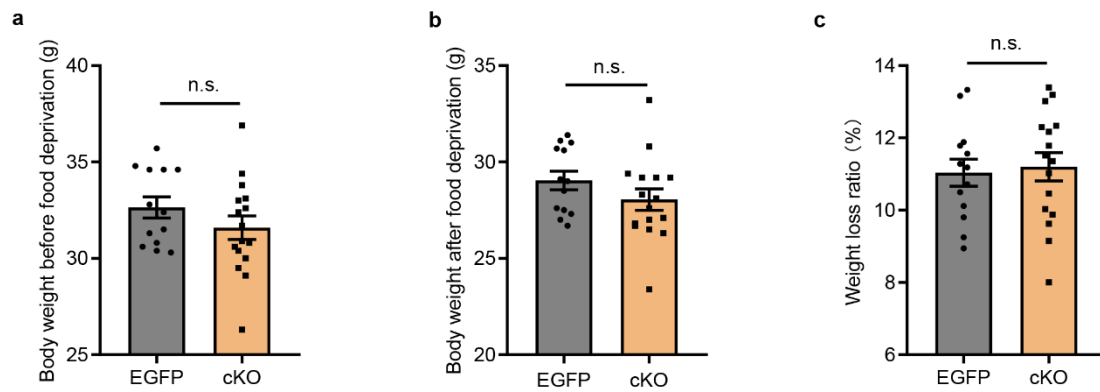

### Supplementary Figure 3. *Fto* knockout in the hippocampus does not affect body weight or weight loss in response to food deprivation

(a) Body weight of cKO and control mice before food deprivation. (b) Body weight of cKO and control mice after 24 h of food deprivation. (c) Weight loss ratio of cKO and control mice in response to 24 h of food deprivation. EGFP, n = 13; cKO, n = 16. n.s., no significant. Two-tailed Student's t-test. Error bars represent s.e.m. Source data are provided as a Source Data file.

## Supplementary Figure 4.

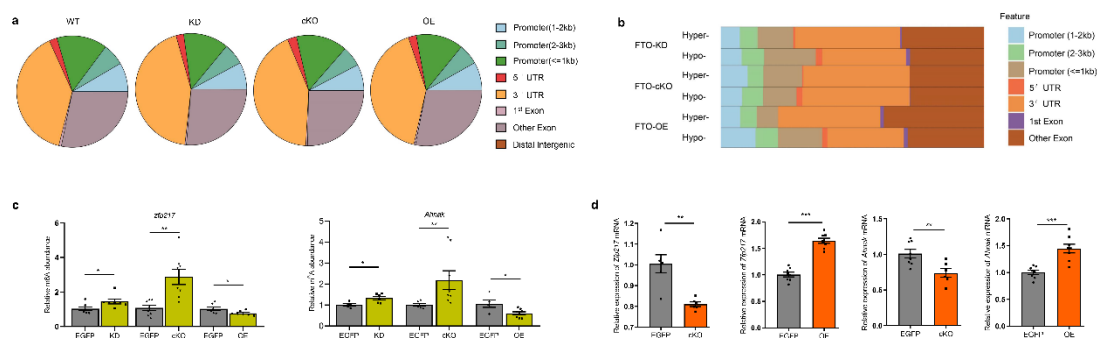

### Supplementary Figure 4. Analysis of m<sup>6</sup>A-modified genes regulated by FTO

**(a)** Annotation of m<sup>6</sup>A peaks detected in different samples. **(b)** Annotation of differentially methylated peaks detected in KD, cKO, and OE mice. **(c)** Gene-specific m<sup>6</sup>A qPCR assay used to verify the m<sup>6</sup>A levels in the *Zfp217* and *Ahnak* mRNA, which are the identified targets modified by FTO. *Zfp217*, n = 7, 7, 8, 8, 7, 7 from left to right; *Ahnak*, n = 5, 6, 6, 8, 5, 8 from left to right. *Zfp217*, EGFP vs. KD, p = 0.0353, EGFP vs. cKO, p = 0.0011; EGFP vs. OE, p = 0.0432. *Ahnak*, EGFP vs. KD, p = 0.0159; EGFP vs. cKO, p = 0.0047; EGFP vs. OE, p = 0.0166. **(d)** Expression of the *Zfp217* and *Ahnak* mRNAs in the hippocampi of cKO and OE mice. *Zfp217*, EGFP vs. cKO, n = 6 per group, p = 0.0043; EGFP vs. OE, n = 8, p < 0.0001; *Ahnak*, EGFP, n = 8; cKO, n = 6, EGFP vs. cKO, p = 0.0084; EGFP vs. OE, n = 8, p = 0.0002. \*p < 0.05, \*\*p < 0.01, \*\*\*p < 0.001. Two-tailed Student's t-test. Error bars represent s.e.m. Source data are provided as a Source Data file.

## Supplementary Figure 5.

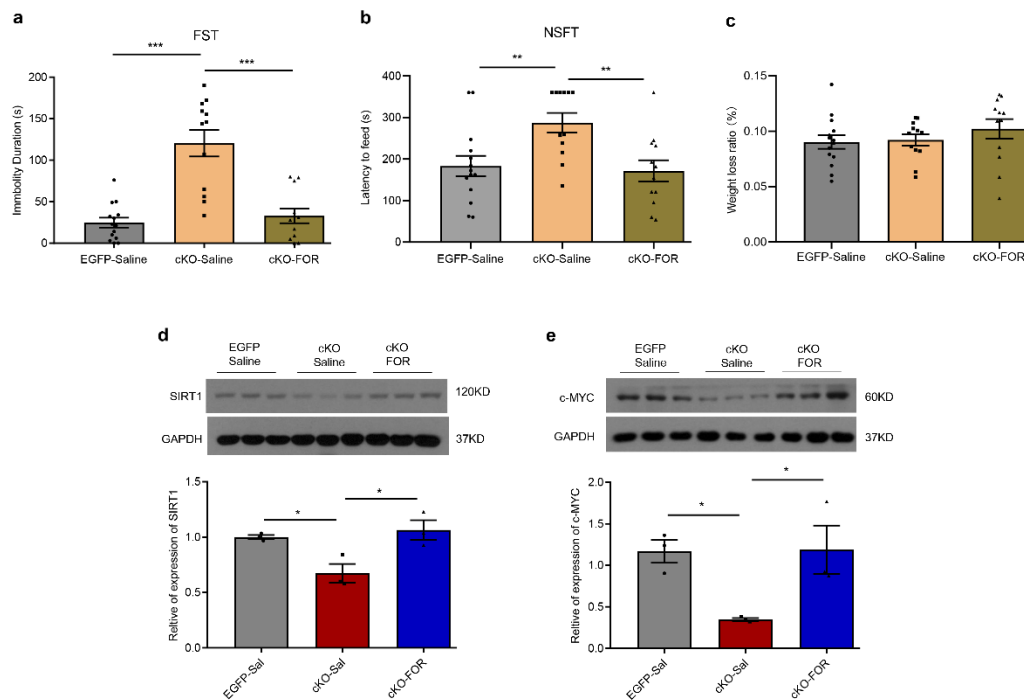

### Supplementary Figure 5. ADRB2 stimulation in the hippocampus rescues depression-like behaviors and c-MYC/SIRT1 protein expression caused by hippocampal FTO deficiency

**(a-c)** FST, NSFT and weight loss ratio after infusion with FOR in the hippocampus. EGFP-Sal, n = 14; cKO-Sal, n = 12; cKO + FOR, n = 12. (a) EGFP-Sal vs. cKO-Sal,  $p < 0.0001$ ; cKO-Sal vs. cKO+FOR,  $p < 0.0001$ . (b) EGFP-Sal vs. cKO-Sal,  $p = 0.0097$ ; cKO-Sal vs. cKO+FOR,  $p = 0.0054$ . **(d, e)** SIRT1 and c-MYC expression in the hippocampi of *Fto*-cKO mice treated with FOR, n = 3 (d) EGFP-Sal vs. cKO-Sal,  $p = 0.0357$ ; cKO-Sal vs. cKO+FOR,  $p = 0.0166$ . (e) EGFP-Sal vs. cKO-Sal,  $p = 0.0404$ ; cKO-Sal vs. Cko+FOR,  $p = 0.0366$ . Source data are provided as a Source Data file.

Supplementary Table 1. Information of postmortem human brains

|            | Sex      | Age (years) | Autopsy delay (h) |
|------------|----------|-------------|-------------------|
| Control    | 2 Female | 81-87       | 6-17.6            |
|            | 1 Male   |             |                   |
| Depression | 2 Female | 72-87       | 6-39.0            |
|            | 1 Male   |             |                   |



Supplementary Table 2. Summary of the m6A-seq and RNA-seq of samples

| Sample   | RNA-seq     |                 | m6A-seq     |                    | Peaks | Genes | Common Peaks | Genes Count |
|----------|-------------|-----------------|-------------|--------------------|-------|-------|--------------|-------------|
|          | Total reads | Aligned Reads   | Total reads | Aligned Reads      |       |       |              |             |
| WT-1     | 58.25M      | 30.28M (52.00%) | 64.48M      | 53.26M<br>(82.59%) | 11003 | 5106  | 10162        | 4630        |
| WT-2     | 50.83M      | 27.06M (53.25%) | 55.95M      | 48.23M<br>(86.19%) | 15036 | 6782  |              |             |
| FTO-OE1  | 55.25M      | 25.25M (46.97%) | 54.58M      | 45.04M<br>(82.53%) | 13543 | 5891  | 11531        | 4730        |
| FTO-OE2  | 70.12M      | 33.41M (47.66%) | 51.30M      | 42.20M<br>(86.47%) | 12681 | 5486  |              |             |
| FTO-KD1  | 53.55M      | 28.71M (53.62%) | 58.71M      | 48.42M<br>(82.47%) | 14716 | 6286  | 13250        | 5043        |
| FTO-KD2  | 61.92M      | 33.43M (53.98%) | 48.44M      | 41.57M<br>(85.82%) | 15119 | 6801  |              |             |
| FTO-KD3  | 50.62M      | 29.22M (57.73%) | 47.01M      | 39.71M<br>(84.47%) | 13754 | 6042  | 16959        | 5498        |
| WT-4     | 126.67M     | 95.55M(75.44%)  | 60.60M      | 56.90M<br>(93.89%) | 14420 | 6625  |              |             |
| WT-5     | 134.41M     | 102.73M(76.43%) | 76.53M      | 71.86M<br>(93.89%) | 15670 | 7052  | 14833        | 6072        |
| WT-6     | 135.57M     | 103.37M(76.25%) | 64.64M      | 60.80M<br>(94.06%) | 14625 | 6625  |              |             |
| FTO-cKO1 | 144.58M     | 108.02M(74.72%) | 60.15M      | 56.19M<br>(93.42%) | 15558 | 6889  | 14833        | 6072        |
| FTO-cKO2 | 142.66M     | 107.61M(75.44%) | 64.58M      | 60.04M<br>(92.97%) | 15064 | 6820  |              |             |

M million; WT wild type; FTO-cKO FTO-conditional knockout; FTO-OE FTO-overexpression; FTO-KD FTO-knockdown.

Supplementary Table 3. Log<sub>2</sub>(fold change) of potential targets of FTO

| Gene          | FTO-KD | FTO-cKO | FTO-OE |
|---------------|--------|---------|--------|
| Gm12992       | 2.50   | 6.45    | -9.74  |
| Zim3          | 5.73   | 5.64    | -8.48  |
| Gcnt1         | 1.36   | 4.10    | -3.75  |
| Zfp217        | 1.56   | 5.67    | -2.77  |
| 5830417I10Rik | 1.11   | 1.78    | -2.57  |
| Zscan29       | 2.39   | 1.15    | -1.94  |
| Pcdhb11       | 1.31   | 1.72    | -1.88  |
| Adrb2         | 1.33   | 7.52    | -1.81  |
| Ago4          | 1.30   | 3.47    | -1.74  |
| Dnase1        | 7.77   | 7.72    | -1.70  |
| Abi3          | 1.38   | 1.16    | -1.60  |
| Ntn3          | 1.03   | 1.06    | -1.56  |
| Zfp599        | 1.45   | 1.85    | -1.56  |
| Itpkc         | 1.40   | 3.80    | -1.53  |
| Ahnak         | 1.20   | 1.37    | -1.50  |
| Celsr1        | 1.84   | 1.44    | -1.49  |
| Nrros         | 1.66   | 2.41    | -1.47  |
| Arsj          | 2.69   | 2.24    | -1.47  |
| Pcdhb4        | 1.19   | 1.00    | -1.47  |
| Fam124a       | 1.12   | 5.23    | -1.40  |
| Dse           | 1.17   | 8.21    | -1.39  |
| Zfp551        | 1.23   | 1.18    | -1.38  |
| Pnma1         | 2.21   | 1.84    | -1.37  |
| Amer1         | 1.03   | 1.57    | -1.36  |
| 9130024F11Rik | 1.31   | 1.47    | -1.31  |
| Gm9899        | 1.78   | 1.46    | -1.26  |
| Gm6981        | 1.81   | 1.50    | -1.25  |
| C1ra          | 2.33   | 1.08    | -1.23  |
| Ankrd34c      | 2.12   | 6.83    | -1.15  |
| Bmf           | 2.00   | 6.55    | -1.14  |
| Nfatc2        | 1.75   | 6.96    | -1.13  |
| Kif26a        | 1.38   | 1.51    | -1.07  |
| Zfp786        | 1.08   | 1.82    | -1.06  |
| Fndc9         | 1.76   | 6.03    | -1.04  |

Supplementary Table 4. Primers

| Gene name                            | Forward Primer         | Reverse Primer          |
|--------------------------------------|------------------------|-------------------------|
| <i>Mettl3</i>                        | GGACTCTGGGCACTTGGATTT  | ATCAGTGGGCAAGGTCAAGG    |
| <i>Mettl14</i>                       | TGGGAGAGTATGCTTGCGAA   | CACGGTTCCTTTGATCCCCA    |
| <i>Wtap</i>                          | TCTTGTCATGCGGCTAGCAA   | GCGTAAACTTCCAGGCACTC    |
| <i>Fto</i>                           | CTATAGCTGCGAAGGCTCTG   | TAGCAGTCTCCCTGGTGAAGA   |
| <i>Alkbh5</i>                        | CCCCATCCACATCTTCGAGC   | ATCAGCAGCATAACCCACTGAG  |
| <i>hMETTL3</i>                       | TTCGAGAGGTGTCAGGGCT    | CGGAAGGTTGGAGACAATGC    |
| <i>hMETTL14</i>                      | CAGAGAACAAAGGAACACTGCC | TTGGTCCAAGTGTGAGCCAG    |
| <i>hWTAP</i>                         | ACAACAGCAGGAGTCTGCAC   | GATCTCAGTTGGGCAACGCT    |
| <i>hFTO</i>                          | GCACACGGGAAGGAGATGTT   | ATGTCATCAGGATGGGCCAC    |
| <i>hALKBH5</i>                       | CTATTCGGGTGTCGGAACCA   | GGGTGCATCTAATCTTGTCTTCT |
| <i>Gapdh</i>                         | TGTGTCCGTCGTGGATCTGA   | TTGCTGTTGAAGTCGCAGGAG   |
| <i>hGAPDH</i>                        | CGGAGTCAACGGATTTGGTC   | TGGGTGGAATCATATTGGAACAT |
| <i>Adrb2</i>                         | ATGTCGGTTATCGTCCTGGC   | GGTTTGTAGTCGCTCGAACTTG  |
| <i>hADRB2</i>                        | TGGTGTGGATTGTGTCAGGC   | GGCTTGGTTCGTGAAGAAGTC   |
| <i>Sirt1</i>                         | ATGTCGGTTATCGTCCTGGC   | GGTTTGTAGTCGCTCGAACTTG  |
| <i>Zfp217</i>                        | AGTCCCCTTGATAAAGCTCTGG | GCACCCATACGTGAAGGAGTC   |
| <i>Ahnak</i>                         | CCACCCCAACTGGGACTTTG   | CACTCCCCTGTAACCTGCCTG   |
| <i>Adrb2</i> Gene-specific m6A qPCR  | GGGCTTTGTGCTCTTTCAA    | TCTATTCCCAGGTCTTTCCA    |
| <i>Zfp217</i> Gene-specific m6A qPCR | ATACTCAACAGAACCGTTGCA  | GTCACACAGGTCACAACCCAT   |
| <i>Ahnak</i> Gene-specific m6A qPCR  | GAGCCTGCCTAAGGCTAACA   | GGCCATGAACATCCACATCT    |
| <i>Sirt1</i> E1                      | AGACAGGGAGGGATGGATG    | AGCCTGGCTATGTCCACAAT    |
| <i>Sirt1</i> E2                      | CCTCACTGCTCCCACAGAG    | TCCGTGGAAGTGTACCTTGG    |
